# Supplementary material for: Combinatorial GxGxE CRISPR screen identifies SLC25A39 in mitochondrial glutathione transport linking iron homeostasis to OXPHOS
Source: PubMed Central journal article supplement (PMC9072411; doi:10.1038/s41467-022-30126-9), 2022-05-05
Supplement: 41467_2022_30126_MOESM12_ESM.pdf [file 41467_2022_30126_MOESM12_ESM.pdf]

## Reporting Summary

Nature Research wishes to improve the reproducibility of the work that we publish. This form provides structure for consistency and transparency in reporting. For further information on Nature Research policies, see our [Editorial Policies](#) and the [Editorial Policy Checklist](#).

### Statistics

For all statistical analyses, confirm that the following items are present in the figure legend, table legend, main text, or Methods section.

- | n/a                                 | Confirmed                                                                                                                                                                                                                                                                                      |
|-------------------------------------|------------------------------------------------------------------------------------------------------------------------------------------------------------------------------------------------------------------------------------------------------------------------------------------------|
| <input type="checkbox"/>            | <input checked="" type="checkbox"/> The exact sample size ( $n$ ) for each experimental group/condition, given as a discrete number and unit of measurement                                                                                                                                    |
| <input type="checkbox"/>            | <input checked="" type="checkbox"/> A statement on whether measurements were taken from distinct samples or whether the same sample was measured repeatedly                                                                                                                                    |
| <input type="checkbox"/>            | <input checked="" type="checkbox"/> The statistical test(s) used AND whether they are one- or two-sided<br><i>Only common tests should be described solely by name; describe more complex techniques in the Methods section.</i>                                                               |
| <input type="checkbox"/>            | <input checked="" type="checkbox"/> A description of all covariates tested                                                                                                                                                                                                                     |
| <input type="checkbox"/>            | <input checked="" type="checkbox"/> A description of any assumptions or corrections, such as tests of normality and adjustment for multiple comparisons                                                                                                                                        |
| <input type="checkbox"/>            | <input checked="" type="checkbox"/> A full description of the statistical parameters including central tendency (e.g. means) or other basic estimates (e.g. regression coefficient) AND variation (e.g. standard deviation) or associated estimates of uncertainty (e.g. confidence intervals) |
| <input type="checkbox"/>            | <input checked="" type="checkbox"/> For null hypothesis testing, the test statistic (e.g. $F$ , $t$ , $r$ ) with confidence intervals, effect sizes, degrees of freedom and $P$ value noted<br><i>Give <math>P</math> values as exact values whenever suitable.</i>                            |
| <input checked="" type="checkbox"/> | <input type="checkbox"/> For Bayesian analysis, information on the choice of priors and Markov chain Monte Carlo settings                                                                                                                                                                      |
| <input checked="" type="checkbox"/> | <input type="checkbox"/> For hierarchical and complex designs, identification of the appropriate level for tests and full reporting of outcomes                                                                                                                                                |
| <input type="checkbox"/>            | <input checked="" type="checkbox"/> Estimates of effect sizes (e.g. Cohen's $d$ , Pearson's $r$ ), indicating how they were calculated                                                                                                                                                         |

*Our web collection on [statistics for biologists](#) contains articles on many of the points above.*

### Software and code

Policy information about [availability of computer code](#)

**Data collection** Xcalibur 4.1 (Thermo Scientific) for mass spec data acquisition and Compound discoverer 3.1 (Thermo Scientific) for mass spec data processing. RT-qPCR data was collected using StepOne Software (version 2.1 Applied Biosystems). Western blot data was imaged/collected using image Lab Touch Software in ChemIDoc MP (version 2.4.0.03 BioRad).

**Data analysis** Xcalibur 4.1 (Thermo Scientific) and Tracefinder 4.1. (Thermo Scientific) for mass spec data analysis. GraphPad 7.0a (Prism) was used for statistics for cell characterization and mass spec data. R version 3.6.0 and Bioconductor (r3.9) were used for screen data analysis. RT-qPCR data was analyzed using StepOne Software (version 2.1 Applied Biosystems).

For manuscripts utilizing custom algorithms or software that are central to the research but not yet described in published literature, software must be made available to editors and reviewers. We strongly encourage code deposition in a community repository (e.g. GitHub). See the Nature Research [guidelines for submitting code & software](#) for further information.

### Data

Policy information about [availability of data](#)

All manuscripts must include a [data availability statement](#). This statement should provide the following information, where applicable:

- Accession codes, unique identifiers, or web links for publicly available datasets
- A list of figures that have associated raw data
- A description of any restrictions on data availability

The screen data are available within the paper and its supplementary data files. Source data are provided with this paper.

## Field-specific reporting

Please select the one below that is the best fit for your research. If you are not sure, read the appropriate sections before making your selection.

Life sciences       Behavioural & social sciences       Ecological, evolutionary & environmental sciences

For a reference copy of the document with all sections, see [nature.com/documents/nr-reporting-summary-flat.pdf](https://nature.com/documents/nr-reporting-summary-flat.pdf)

## Life sciences study design

All studies must disclose on these points even when the disclosure is negative.

|                 |                                                                                                                                                                                                                                                                                                                                                       |
|-----------------|-------------------------------------------------------------------------------------------------------------------------------------------------------------------------------------------------------------------------------------------------------------------------------------------------------------------------------------------------------|
| Sample size     | The CRISPR screen was performed in two independent batches. Cell proliferation and mass spec experiments were performed with n = 3 independent biological samples unless stated otherwise. Sample sizes were predetermined based on effect size, standard deviation and significance level required from previous studies or on available literature. |
| Data exclusions | no exclusion criteria were used for analysis.                                                                                                                                                                                                                                                                                                         |
| Replication     | All cell proliferation and mass spec experiments were performed at least two independent times. Replicate experiments were successful.                                                                                                                                                                                                                |
| Randomization   | N/A All experiments were done in vitro.                                                                                                                                                                                                                                                                                                               |
| Blinding        | N/A All experiments were done in vitro.                                                                                                                                                                                                                                                                                                               |

## Reporting for specific materials, systems and methods

We require information from authors about some types of materials, experimental systems and methods used in many studies. Here, indicate whether each material, system or method listed is relevant to your study. If you are not sure if a list item applies to your research, read the appropriate section before selecting a response.

### Materials & experimental systems

| n/a                                 | Involved in the study                                     |
|-------------------------------------|-----------------------------------------------------------|
| <input type="checkbox"/>            | <input checked="" type="checkbox"/> Antibodies            |
| <input type="checkbox"/>            | <input checked="" type="checkbox"/> Eukaryotic cell lines |
| <input checked="" type="checkbox"/> | <input type="checkbox"/> Palaeontology and archaeology    |
| <input checked="" type="checkbox"/> | <input type="checkbox"/> Animals and other organisms      |
| <input checked="" type="checkbox"/> | <input type="checkbox"/> Human research participants      |
| <input checked="" type="checkbox"/> | <input type="checkbox"/> Clinical data                    |
| <input checked="" type="checkbox"/> | <input type="checkbox"/> Dual use research of concern     |

### Methods

| n/a                                 | Involved in the study                           |
|-------------------------------------|-------------------------------------------------|
| <input checked="" type="checkbox"/> | <input type="checkbox"/> ChIP-seq               |
| <input checked="" type="checkbox"/> | <input type="checkbox"/> Flow cytometry         |
| <input checked="" type="checkbox"/> | <input type="checkbox"/> MRI-based neuroimaging |

## Antibodies

|                 |                                                                                                                                                                                                                                                                                                                                                                                                                                                                                                                                                                                                                                                                                                                                                                                                                                                                                                                                                                                                                                                                                                                                                                                                                                                                                                                                                                                                                                                                                                                                                                                                        |
|-----------------|--------------------------------------------------------------------------------------------------------------------------------------------------------------------------------------------------------------------------------------------------------------------------------------------------------------------------------------------------------------------------------------------------------------------------------------------------------------------------------------------------------------------------------------------------------------------------------------------------------------------------------------------------------------------------------------------------------------------------------------------------------------------------------------------------------------------------------------------------------------------------------------------------------------------------------------------------------------------------------------------------------------------------------------------------------------------------------------------------------------------------------------------------------------------------------------------------------------------------------------------------------------------------------------------------------------------------------------------------------------------------------------------------------------------------------------------------------------------------------------------------------------------------------------------------------------------------------------------------------|
| Antibodies used | Anti-SLC25A39 (Proteintech, 14963-1-AP, 1:100); Anti-VDAC (Cell Signaling Technology, 4661T, 1:1000); Anti-SHMT2 (Sigma-Aldrich, HPA-020549, 1:1000); Anti-Calreticulin (Cell Signaling Technology, 12238T, 1:1000); Anti-LAMP2 (Santa Cruz Biotechnology, sc-18822, 1:1000); Anti-NDUFA7 (Proteintech, 15300-1-AP, 1:500); total OXPPOS human WB antibody Cocktail (Abcam, ab110411, 1:1000); GAPDH (Invitrogen, 39-8600, 1:1000).                                                                                                                                                                                                                                                                                                                                                                                                                                                                                                                                                                                                                                                                                                                                                                                                                                                                                                                                                                                                                                                                                                                                                                    |
| Validation      | validation statements have been provided on the company website.<br>Anti-SLC25A39: validated using the CRISPR KO cells and overexpression cells. <a href="https://www.ptglab.com/products/SLC25A39-Antibody-14963-1-AP.htm">https://www.ptglab.com/products/SLC25A39-Antibody-14963-1-AP.htm</a><br>Anti-VDAC: <a href="https://www.cellsignal.com/products/primary-antibodies/vdac-d73d12-rabbit-mab/4661">https://www.cellsignal.com/products/primary-antibodies/vdac-d73d12-rabbit-mab/4661</a><br>Anti-SHMT2: <a href="https://www.sigmaaldrich.com/US/en/product/sigma/hpa020549">https://www.sigmaaldrich.com/US/en/product/sigma/hpa020549</a><br>Anti-Calreticulin: <a href="https://www.cellsignal.com/products/primary-antibodies/calreticulin-d3e6-xp-rabbit-mab/12238">https://www.cellsignal.com/products/primary-antibodies/calreticulin-d3e6-xp-rabbit-mab/12238</a><br>Anti-LAMP2: <a href="https://www.scbt.com/p/lamp-2-antibody-h4b4">https://www.scbt.com/p/lamp-2-antibody-h4b4</a><br>Anti-NDUFA7: <a href="https://www.ptglab.com/products/NDUFA7-Antibody-15300-1-AP.htm">https://www.ptglab.com/products/NDUFA7-Antibody-15300-1-AP.htm</a><br>total OXPPOS human WB antibody Cocktail: <a href="https://www.abcam.com/total-oxphos-human-wb-antibody-cocktail-ab110411.html">https://www.abcam.com/total-oxphos-human-wb-antibody-cocktail-ab110411.html</a><br>GAPDH: <a href="https://www.thermofisher.com/antibody/product/GAPDH-Antibody-clone-ZG003-Monoclonal/39-8600">https://www.thermofisher.com/antibody/product/GAPDH-Antibody-clone-ZG003-Monoclonal/39-8600</a> |

## Eukaryotic cell lines

---

Policy information about [cell lines](#)

Cell line source(s)

K562 (ATCC CCL-243), HeLa Cells (cloned in the De Camilli lab, ATCC), HEK293T(ATCC CRL-3216 ),HEK293FT(Thermo Fisher R70007)

Authentication

STR profiling

Mycoplasma contamination

Cell lines were verified to be free of mycoplasma contamination

Commonly misidentified lines  
(See [ICLAC](#) register)

The cell lines used in the study were obtained from ATCC and Thermo Fisher.
